# Supplementary material for: New sandwich complexes of praseodymium(iii) containing triazacyclohexane ligands
Source: Royal Society of Chemistry journal article supplement (doi:10.1039/b110784b), 2002-01-01
Supplement: b110784b.doc [file b110784b.doc]

**Supplementary Electronic Information (ESI)**

**Fig. S1** UV-Vis spectra of Pr(OTf)3 in water (curve A) and [(Me3TAC)2Pr(OTf)3] in THF (curve B)

**Fig. S2** 1H diffusion data for a solution of [(Me3TAC)2Pr(OTf)3] in C6D6 for the signals at 30 ppm () (D=8.4(11)10-10 m2s-1) and 34 ppm (****) (D=5.8(3)10-10 m2s-1). The signals are much more affected by the paramagnetism than those for the Me groups at 8.6 ppm () (D=7.3(1)10-10 m2s-1) and 14 ppm () (D=5.4(2)10-10 m2s-1). However, data were obtained using =9 ms, =0.3 ms and =15 ms with 10 ms acquisition time and indicate that the signals at 8.6 and 30 ppm belong to the same molecule and those at 14 and 34 ppm belong to another.
